# Supplementary figures and images for: Integrative Analysis Reveals the Landscape of Hypoxia-Inducible Factor (HIF) Family Genes in Pan-Cancer
Source: Hindawi journal article supplement (doi:10.1155/2020/8873104), 2020-11-24

A

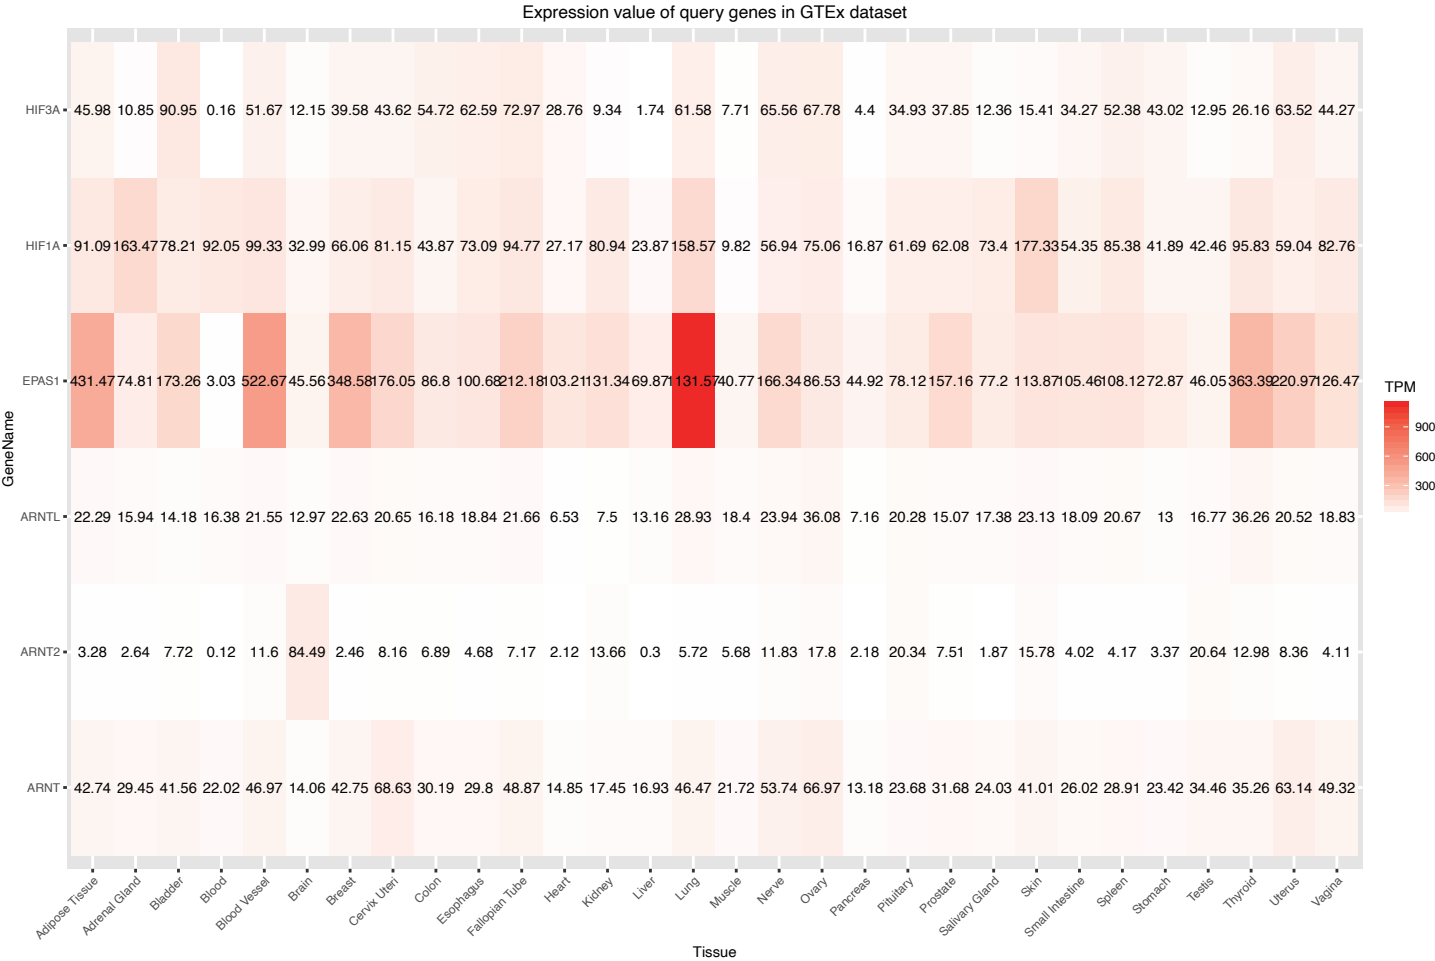

B

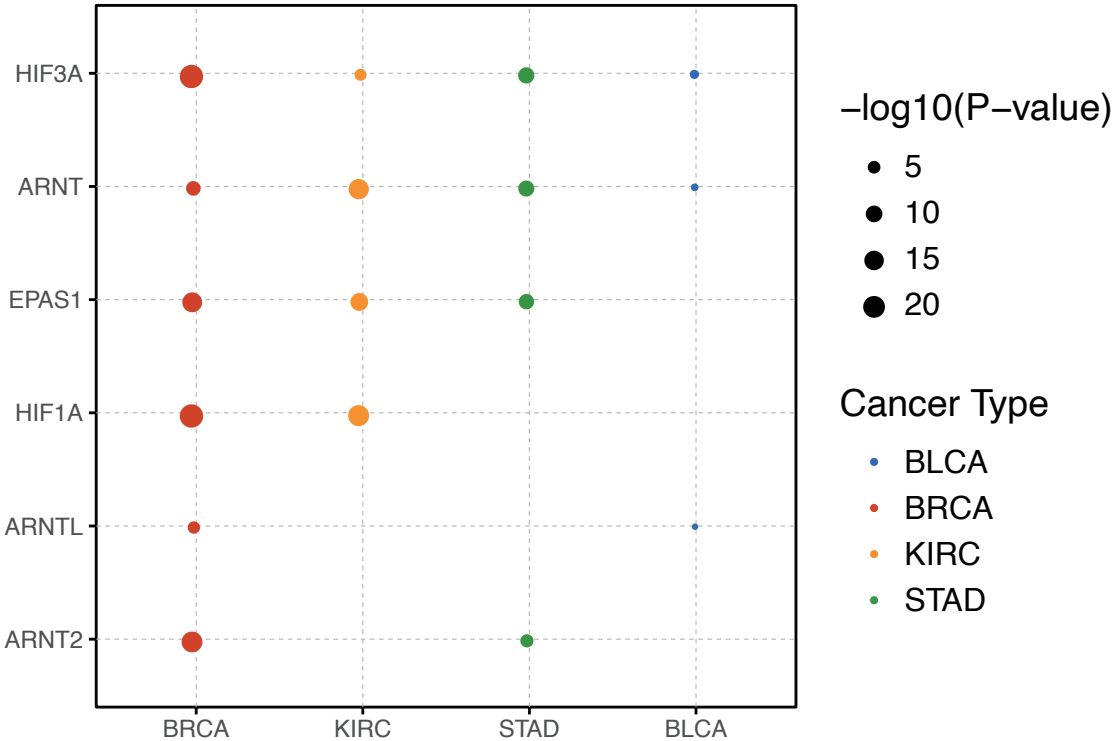

Supplement: f1 [file 8873104.f1.zip]

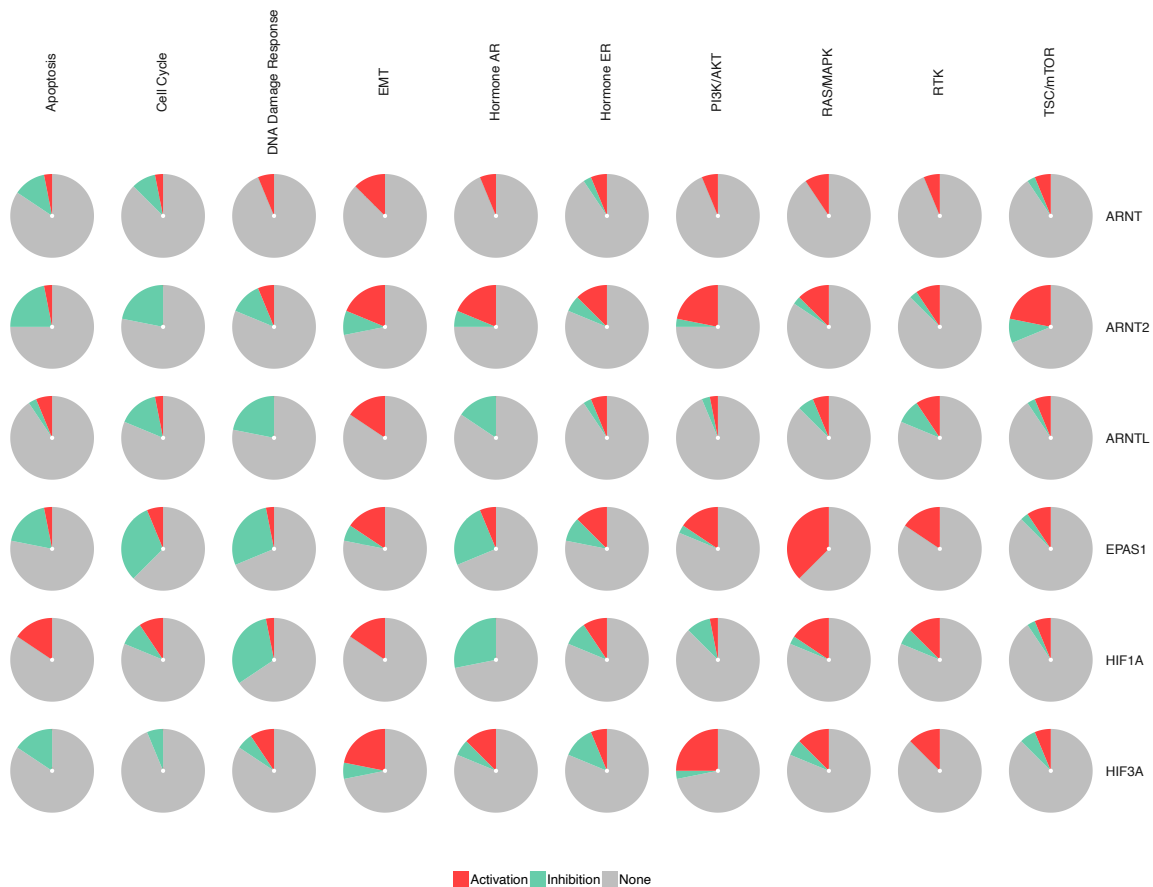

Supplement: f1 [file 8873104.f1.zip]

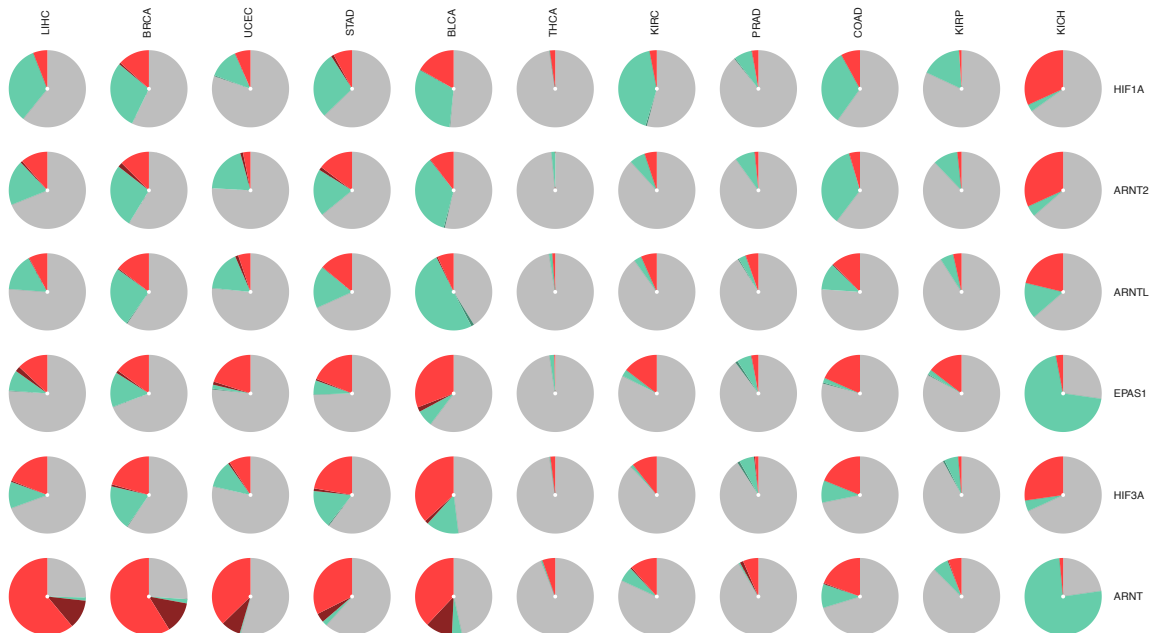

■ Hete Amp 
 ■ Homo Amp 
 ■ Hete Del 
 ■ Homo Del 
 ■ None

Supplement: f1 [file 8873104.f1.zip]

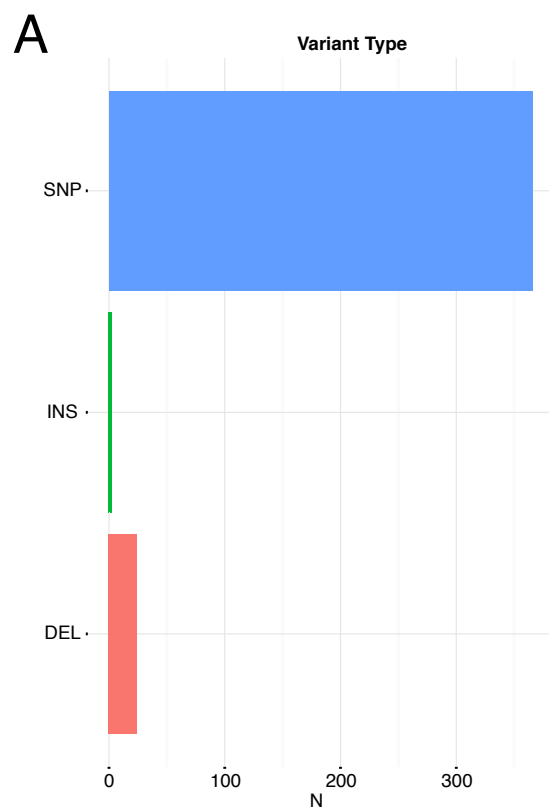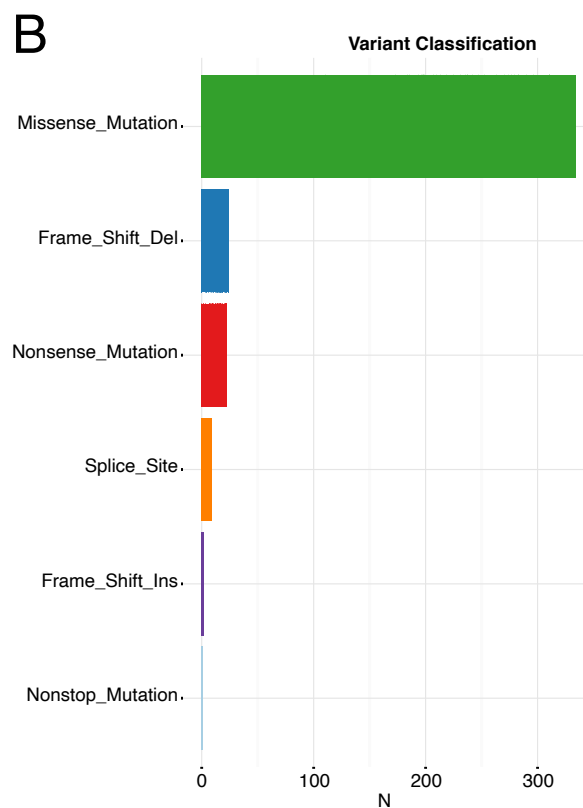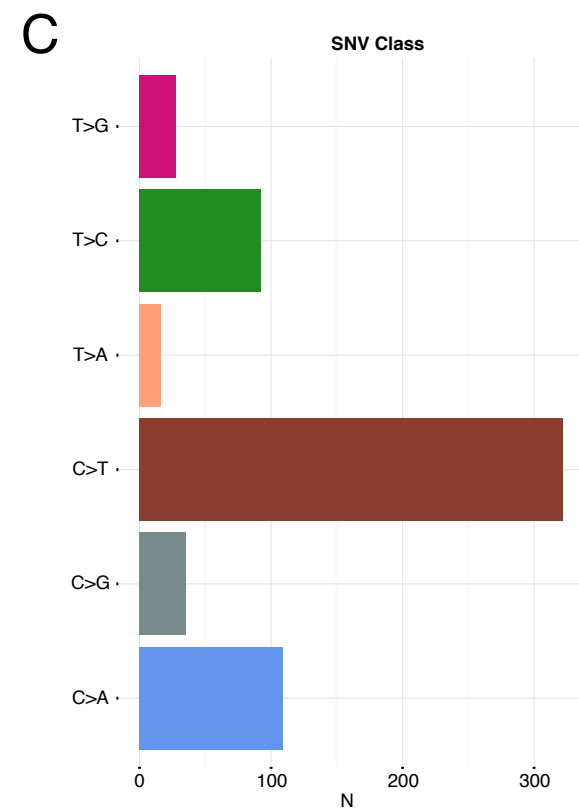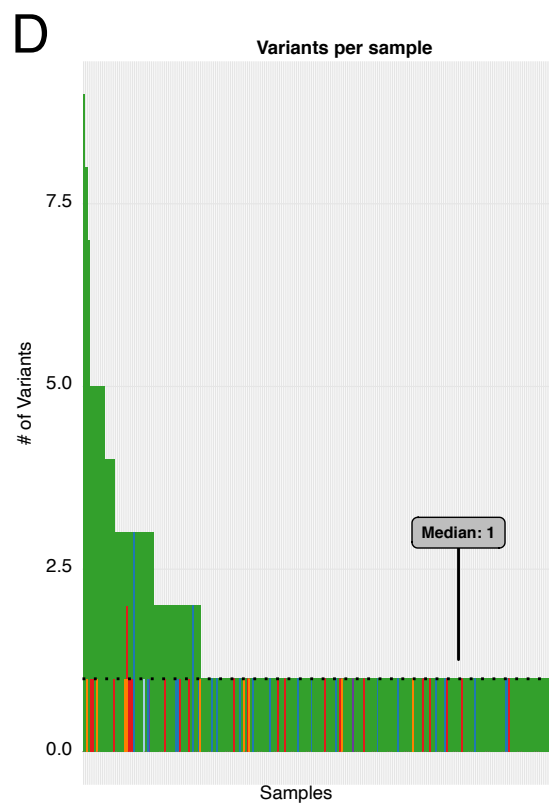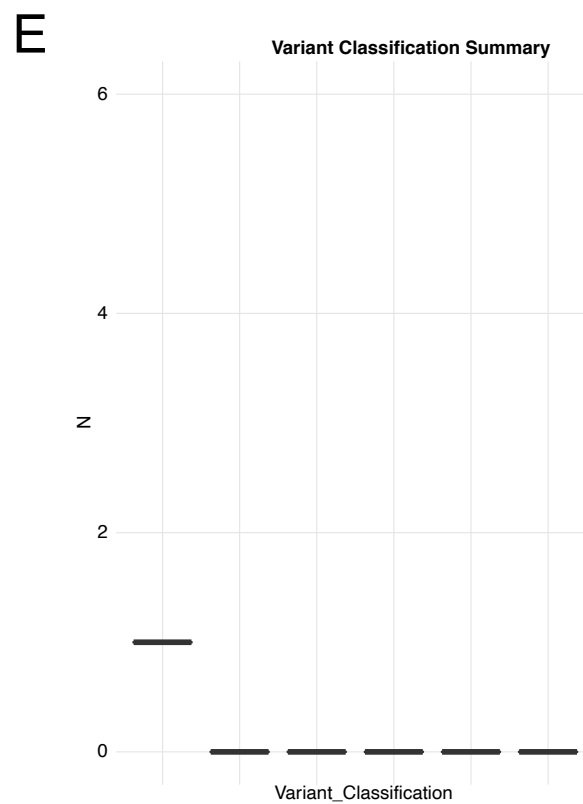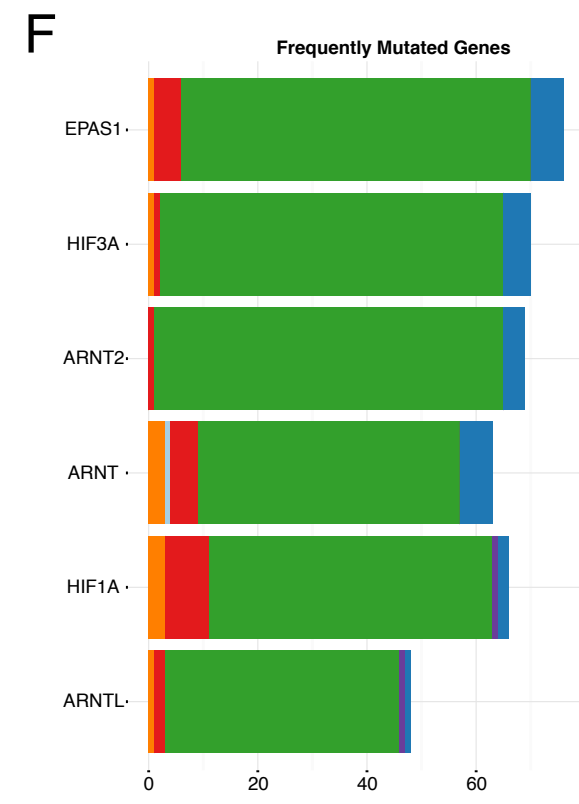

Supplement: f1 [file 8873104.f1.zip]
